# Supplementary material for: Maintaining hypoxia environment of subchondral bone alleviates osteoarthritis progression
Source: PubMed Central journal article supplement — Sci Adv. 2023 Apr 5;9(14):eabo7868. doi: 10.1126/sciadv.abo7868 (PMC10075992; doi:10.1126/sciadv.abo7868), 2023-04-05
Supplement: sciadv.abo7868_sm.pdf [file sciadv.abo7868_sm.pdf]

Supplementary Materials for  
**Maintaining hypoxia environment of subchondral bone alleviates  
osteoarthritis progression**

Hao Zhang *et al.*

Corresponding author: jingy4172@shu.edu.cn; Xiao Chen, sirchenxiao@126.com; drsujiacan@163.com

*Sci. Adv.* **9**, eabo7868 (2023)  
DOI: 10.1126/sciadv.abo7868

**The PDF file includes:**

Figs. S1 to S16  
Legends for movies S1 and S2

**Other Supplementary Material for this manuscript includes the following:**

Movies S1 and S2

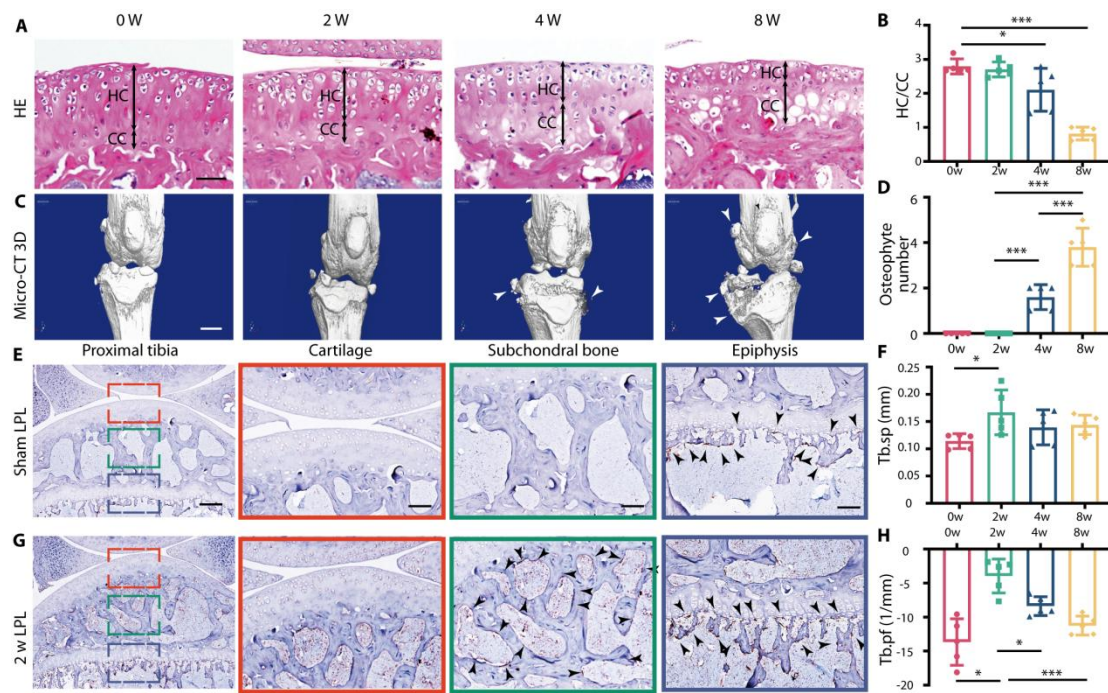

**Fig. S1. Establishment of OA models and L-plastin positive cells distribution.**

(A) Representative images of Hematoxylin and eosin staining of proximal tibia articular cartilage at 0,2,4 and 8 weeks after ACLT. Double-headed arrows label range of HC and CC. Scale bar, 50  $\mu$ m. (B) Ratio of HC and CC thickness. (C) 3D reconstruction of the whole knee joint at 0, 2, 4 and 8 weeks after ACLT. Scale bar, 1 mm. (D) Micro-CT quantitative analysis of knee, osteophyte number. (E) Representative images of LPL immunohistochemistry in whole normal proximal tibia, articular cartilage, subchondral bone, and epiphysis. (F) Micro-CT quantitative analysis of tibial subchondral bone, subchondral bone trabecular separation (Tb.sp, mm). (G) Representative images of LPL immunohistochemistry in whole proximal tibia, articular cartilage, subchondral bone, and epiphysis 2 weeks after ACLT. Scale bar, 100  $\mu$ m (first column). Scale bar, 50  $\mu$ m (2-4 column). (H) Micro-CT quantitative analysis of tibial subchondral bone, subchondral bone trabecular bone pattern factor (Tb.pf, 1/mm). N=5 per group. \*P < 0.05 \*\*P < 0.01, and \*\*\*P < 0.001.

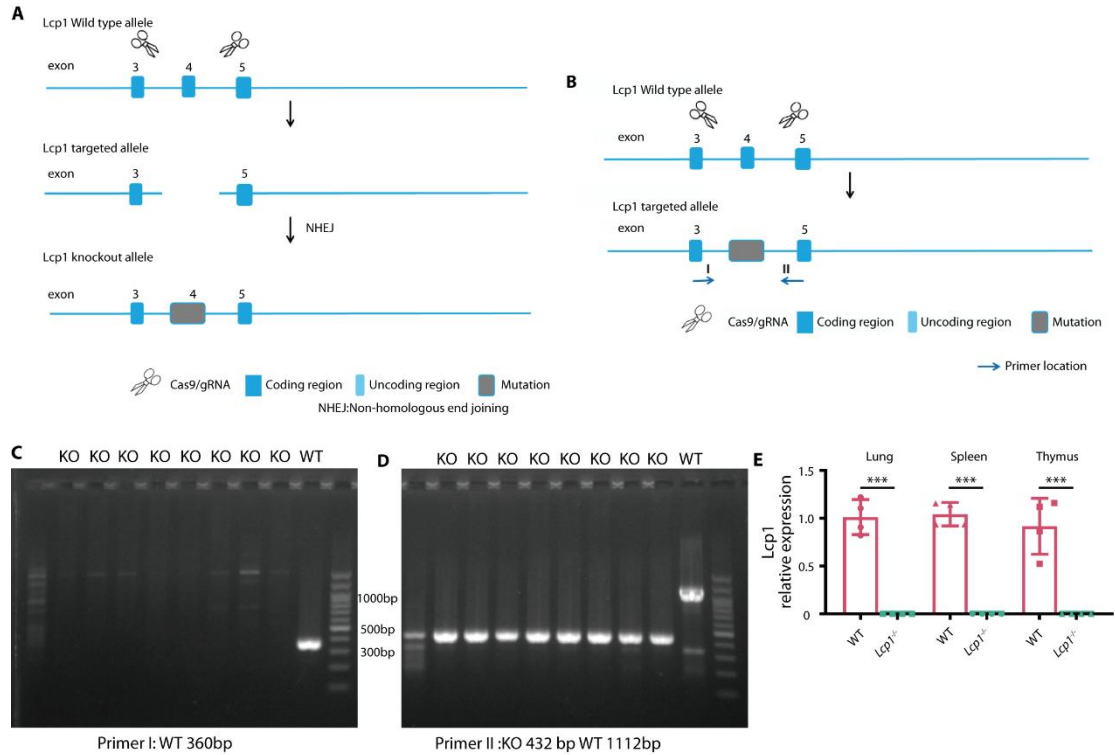

**Fig. S2. *Lcp1* knockout strategy and verification.**

(A) Using Cas9/gRNA to insert a mutated fragment in exon 4 of *Lcp1* gene to knockout *Lcp1* expression. (B) Description of genotyping primer location. (C-D) Genotyping gel imaging of *Lcp1* knockout mice and WT mice. (E) qPCR results of the mRNA level of *Lcp1* in lung, spleen, and thymus in wild type and *Lcp1* knockout mice. N=5 per group. \*P < 0.05, \*\*P < 0.01, and \*\*\*P < 0.001.

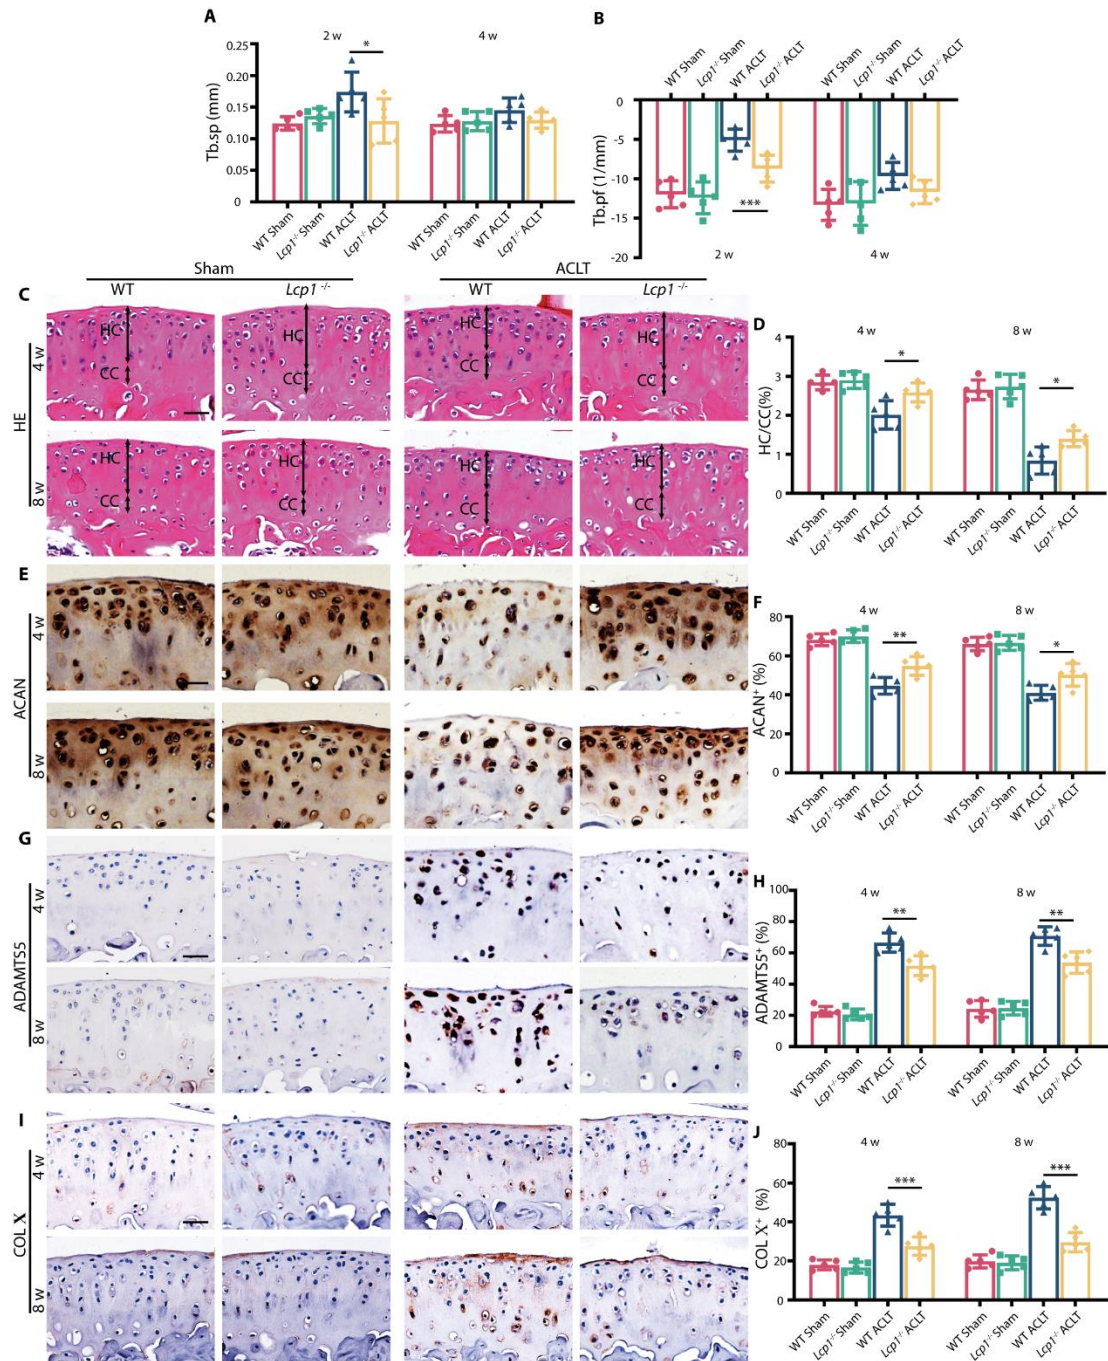

**Fig. S3. Calcified cartilage duplication is retarded in *Lcp1* knockout mice.**

(A) Micro-CT quantitative analysis of tibial subchondral bone trabecular spacing (Tb.sp, mm). (B) Micro-CT quantitative analysis of tibial subchondral bone trabecular bone pattern factor (Tb.pf, 1/mm). (C) Representative images of Hematoxylin and eosin staining of proximal tibia articular cartilage of *Lcp1*<sup>-/-</sup> mice and WT littermates at 4 and 8 weeks after ACLT. Double-headed arrows label range of HC and CC. Scale bar, 50  $\mu$ m. (D) Ratio of HC and CC thickness. (E) Representative images of ACAN

immunohistochemistry in tibial articular cartilage of *Lcp1<sup>-/-</sup>* mice and WT littermates at 4 and 8 weeks after ACLT. Scale bar, 20  $\mu$ m. **(F)** Quantitative analysis of ACAN positive area in articular cartilage. **(G)** Representative images of ADAMTS5 immunohistochemistry in tibial articular cartilage of *Lcp1<sup>-/-</sup>* mice and WT littermates at 4 and 8 weeks after ACLT. Scale bar, 20  $\mu$ m. **(H)** Quantitative analysis of ADAMTS5 positive area in articular cartilage. **(I)** Representative images of COL X immunohistochemistry in tibial articular cartilage of *Lcp1<sup>-/-</sup>* mice and WT littermates at 4 and 8 weeks after ACLT. Scale bar, 20  $\mu$ m. **(J)** Quantitative analysis of COL X positive area in articular cartilage. N=5 per group. \*P < 0.05, \*\*P < 0.01 and \*\*\*P < 0.001.



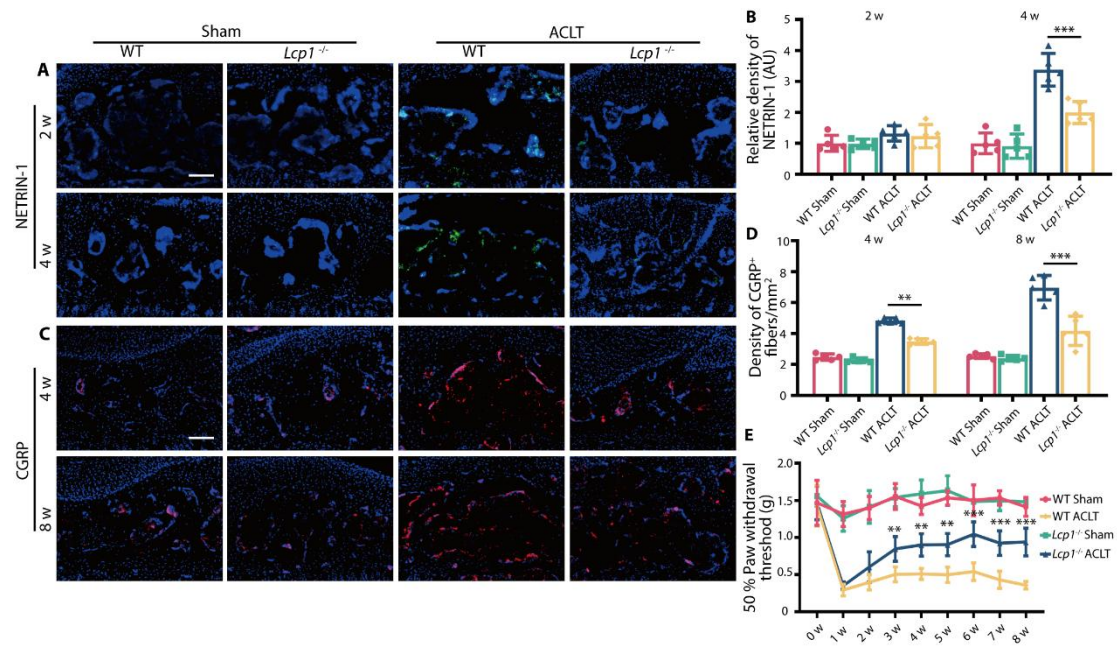

**Fig. S4. *Lcp1* knockout mice show decreased NETRIN-1 and CGRP<sup>+</sup> sensory nerves in the subchondral bone and pain amelioration.**

(A) Immunofluorescence staining of NETRIN-1 in *Lcp1*<sup>-/-</sup> and WT mouse tibial subchondral bone 2 and 4 weeks after ACLT. Scale bars, 100  $\mu$ m. (B) Quantitative analysis of density of NETRIN-1 in subchondral bone marrow. (C) Immunofluorescence staining of CGRP<sup>+</sup> sensory nerve fibers in *Lcp1*<sup>-/-</sup> and WT mouse tibial subchondral bone 4 and 8 weeks after ACLT surgery. Scale bars, 100  $\mu$ m. (D) Quantitative analysis of the density CGRP<sup>+</sup> nerve fibers in subchondral bone marrow. (E) Paw withdrawal threshold was tested at the right hind paw of *Lcp1*<sup>-/-</sup> and WT each week after surgery until 8 weeks. N=5 per group. \*P < 0.05, \*\*P < 0.01 and \*\*\*P < 0.001.

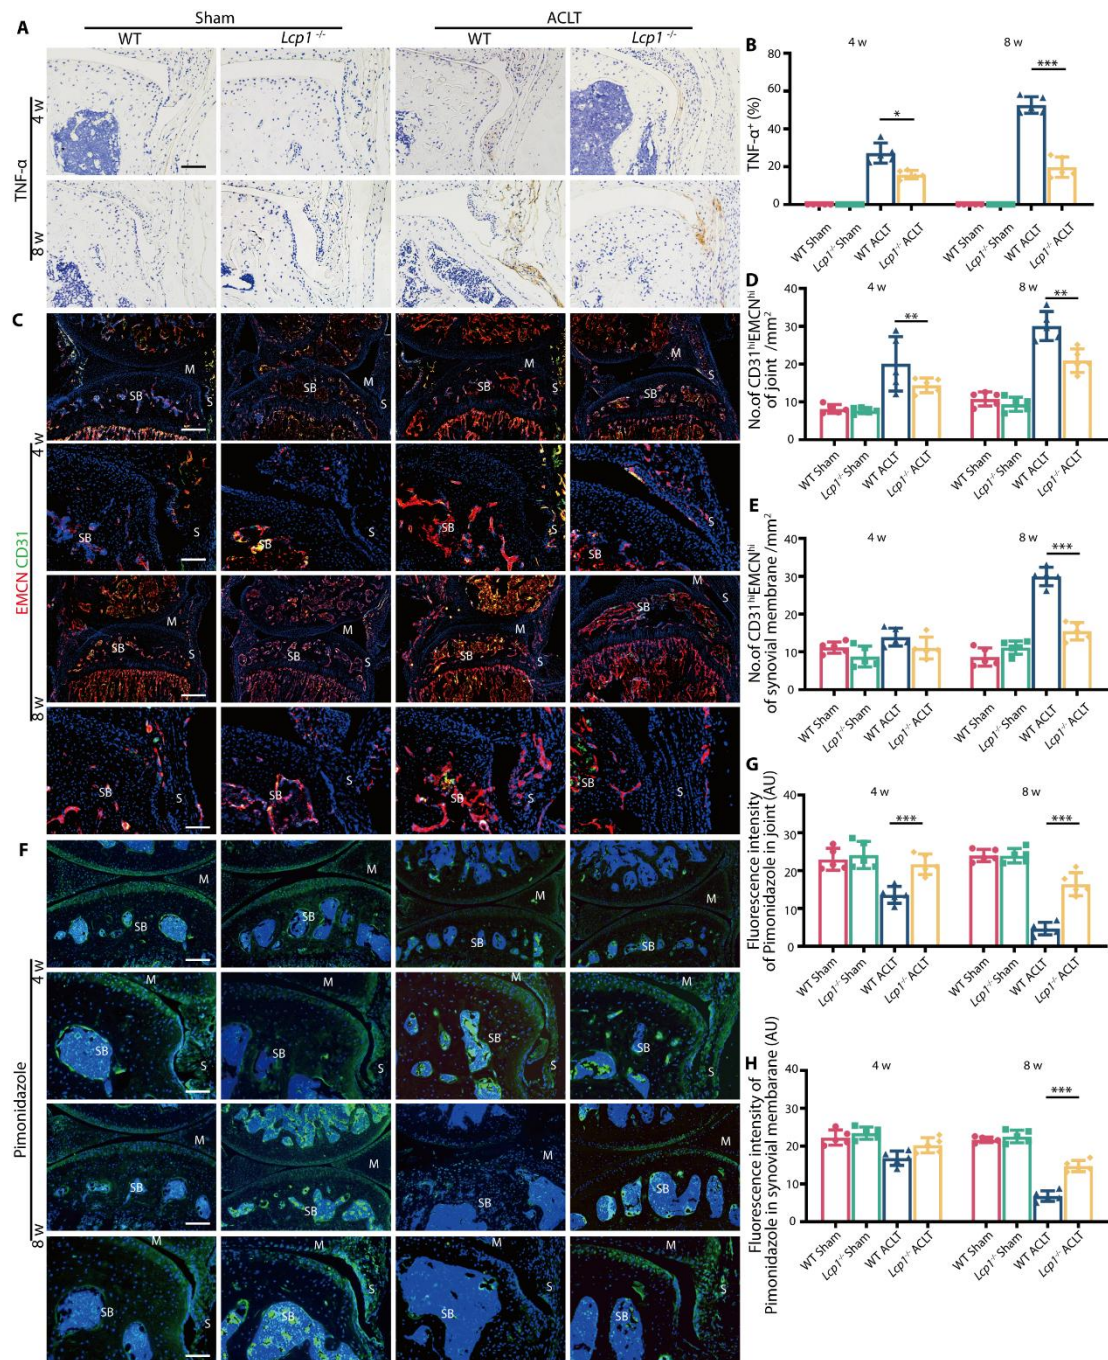

**Fig. S5. Inflammation and angiogenesis in the whole joint.**

(A) Representative images of TNF- $\alpha$  immunohistochemistry in synovium of *Lcp1*<sup>-/-</sup> mice and WT littermates at 4 and 8 weeks after ACLT. Scale bar, 20  $\mu$ m. (B) Quantitative analysis of TNF- $\alpha$  positive area in synovial membrane. (C) Maximum intensity projections of immunostaining of EMCN (red), CD31 (green), and EmcnhiCD31hi (yellow) cells in knee joint and synovial membrane of *Lcp1*<sup>-/-</sup> mice

and WT mice at 4 and 8 weeks post operation. Scale bar, 200  $\mu\text{m}$  (1,3 row), 50  $\mu\text{m}$  (2,4 row). **(D-E)** Quantification of CD31 and EMCN positive cells in knee joint (D) and synovial membrane (E). **(F)** Immunostaining of pimonidazole (green) in knee joint and synovial membrane of *Lcp1<sup>-/-</sup>* mice and WT mice at 4 and 8 weeks post operation. Scale bar, 100  $\mu\text{m}$  (1,3 row), 50  $\mu\text{m}$  (2,4 row). **(G-H)** Quantification of pimonidazole fluorescence intensity in knee joint (G) and synovium (H). N=5 per group. \*P < 0.05, \*\*P < 0.01, and \*\*\*P < 0.001. M=meniscus, S=synovial membrane, SB=subchondral bone.



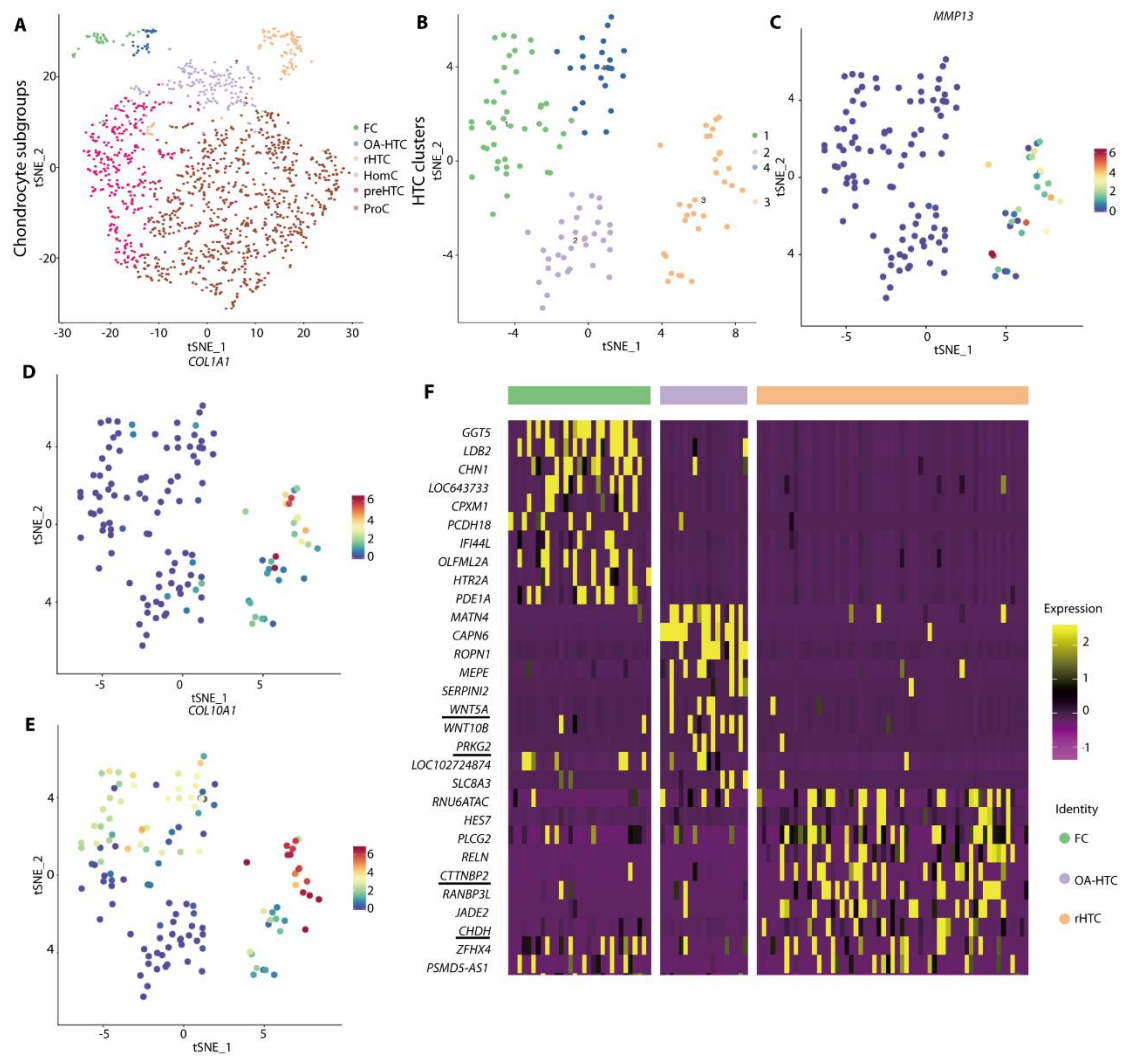

**Fig. S6. HTC subsets definition and characteristics of OA-associated HTC.**

(A) Visualization of t-SNE for different subsets of chondrocytes. (B) Visualization of t-SNE for different subsets of HTCs. (C-E) Dot plots showing the expression of *MMP13*, *COL1A1* and *COL10A1* of HTC subgroups. (F) Heatmap of top 10 different expression genes for FC, OA-HTC and rHTC.

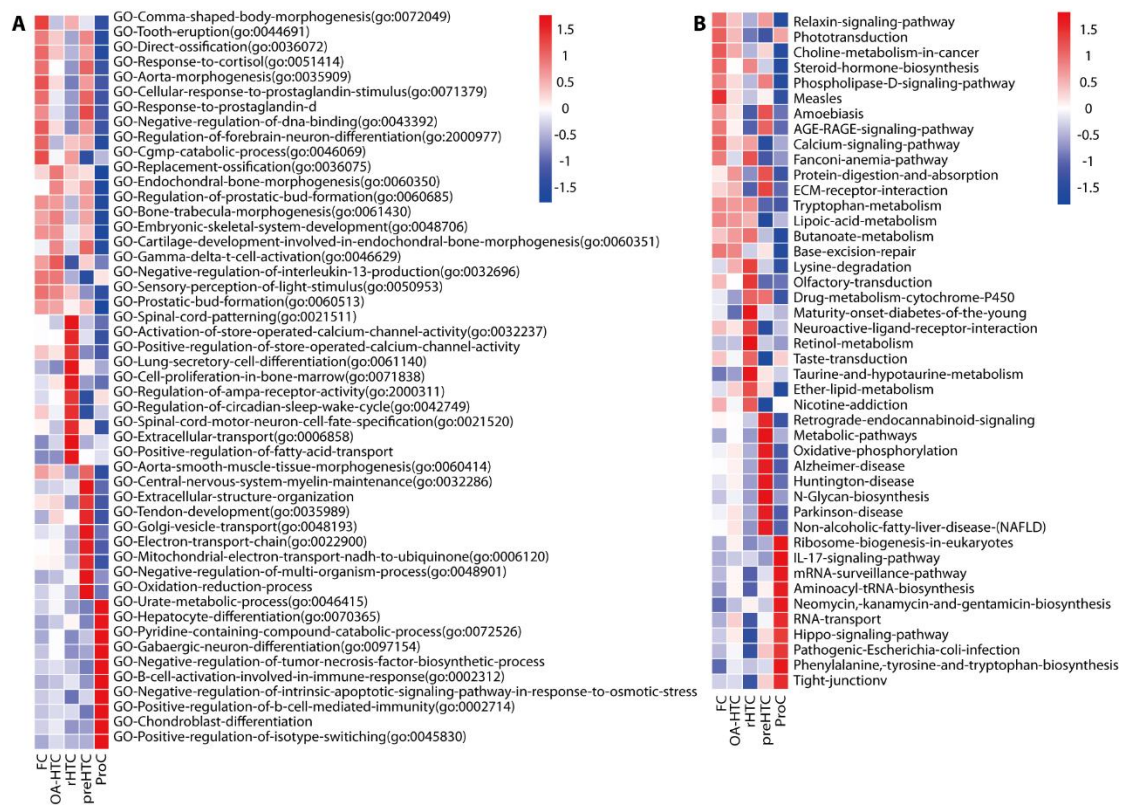

**Fig. S7. KEGG and GO analysis of ProC, PreHTC, rHTC, OA-HTC and FC.**

**(A)** Top 10 GO analysis result of FC, OA-HTC, rHTC, preHTC, and ProC.

**(B)** Top 10 KEGG pathway analysis result of FC, OA-HTC, rHTC, preHTC, and

ProC.

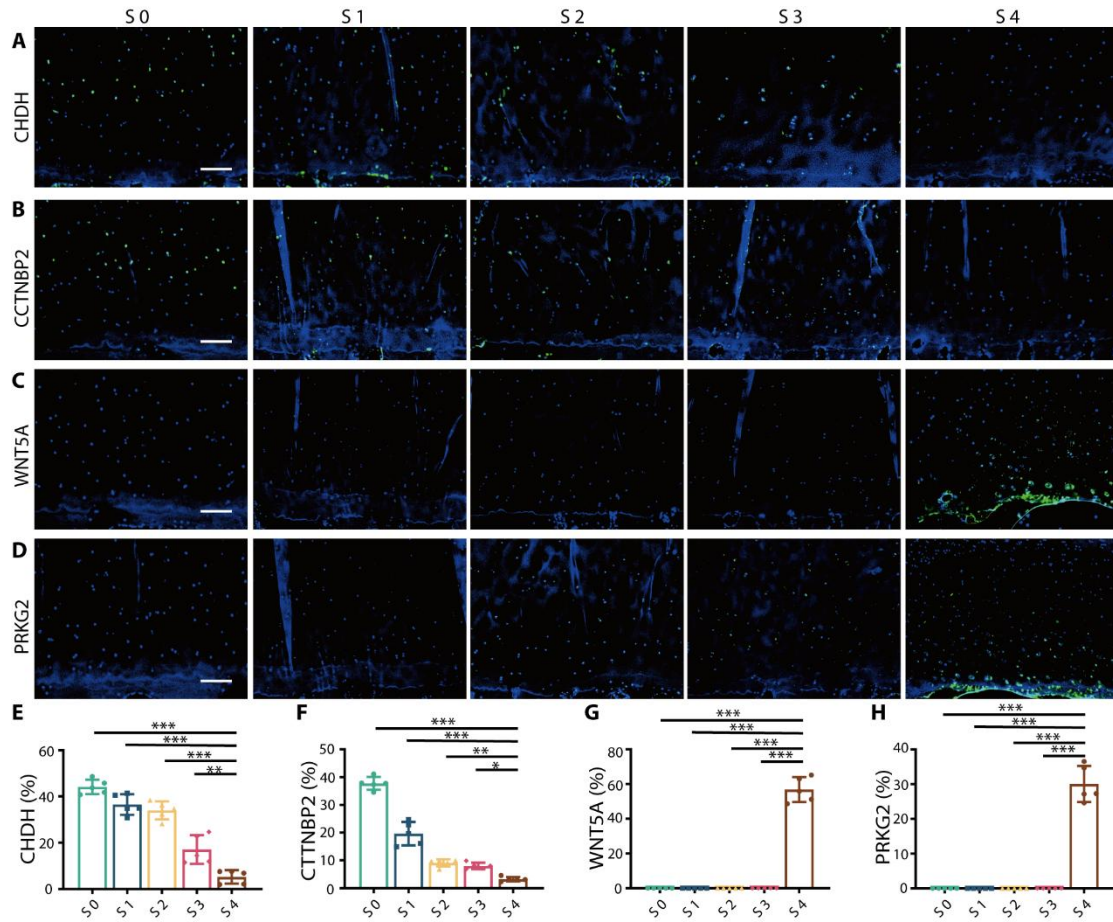

**Fig. S8. HTC subsets verification in human samples.**

(A-D) Immunofluorescence staining of CHDH, CTTNBP2, WNT5A, PRKG2 in different OARSI grade human tibia articular cartilage. Scale bar, 100  $\mu$ m. (E-H) Quantitative analysis of CHDH, CTTNBP2, WNT5A, PRKG2 fluorescence positive area in human articular cartilage of different OARSI grade. N=5 per group. \*P < 0.05, \*\*P < 0.01, and \*\*\*P < 0.001.

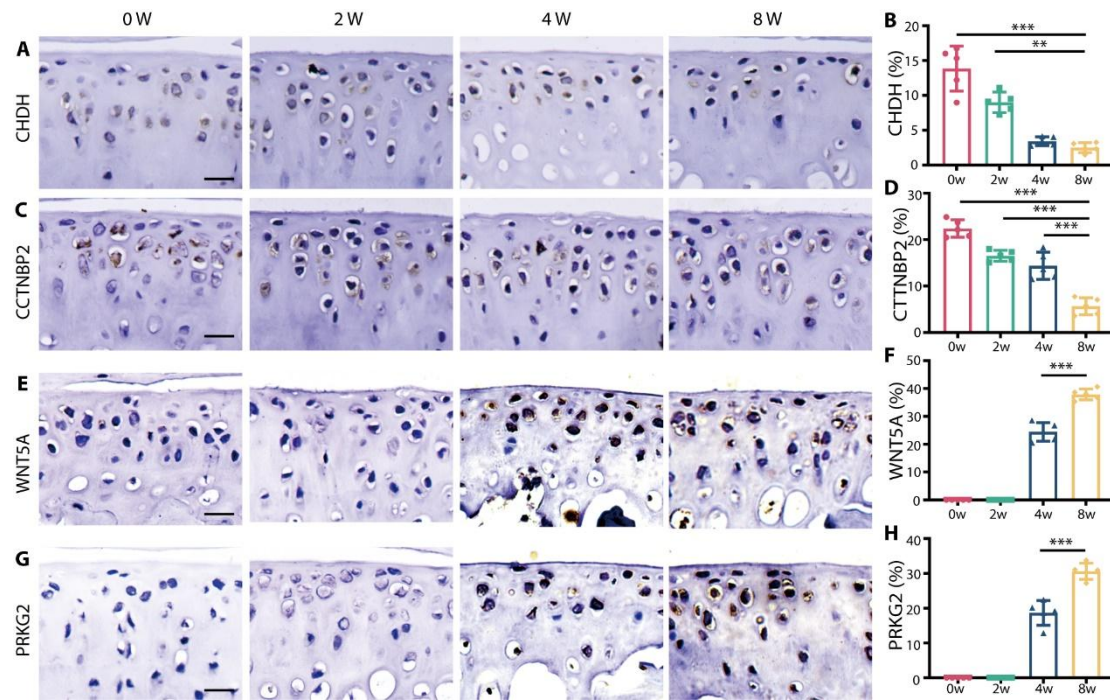

**Fig. S9. HTC subsets verification in mouse samples.**

(A) Representative images of CHDH immunohistochemistry in articular cartilage at 0, 2, 4 and 8 weeks after ACLT operation. Scale bar, 50  $\mu$ m. (B) Quantitative analysis of CHDH positive area in articular cartilage. (C) Representative images of CTTNBP2 immunohistochemistry in articular cartilage at 0, 2, 4 and 8 weeks after ACLT operation. Scale bar, 50  $\mu$ m. (D) Quantitative analysis of CTTNBP2 positive area in articular cartilage. (E) Representative images of WNT5A immunohistochemistry in articular cartilage at 0, 2, 4 and 8 weeks after ACLT operation. Scale bar, 50  $\mu$ m. (F) Quantitative analysis of WNT5A positive area in articular cartilage. (G) Representative images of PRKG2 immunohistochemistry in articular cartilage at 0, 2, 4 and 8 weeks after ACLT operation. Scale bar, 50  $\mu$ m. (H) Quantitative analysis of PRKG2 positive area in articular cartilage. N=5 per group. \*P < 0.05, \*\*P < 0.01, and \*\*\*P < 0.001.



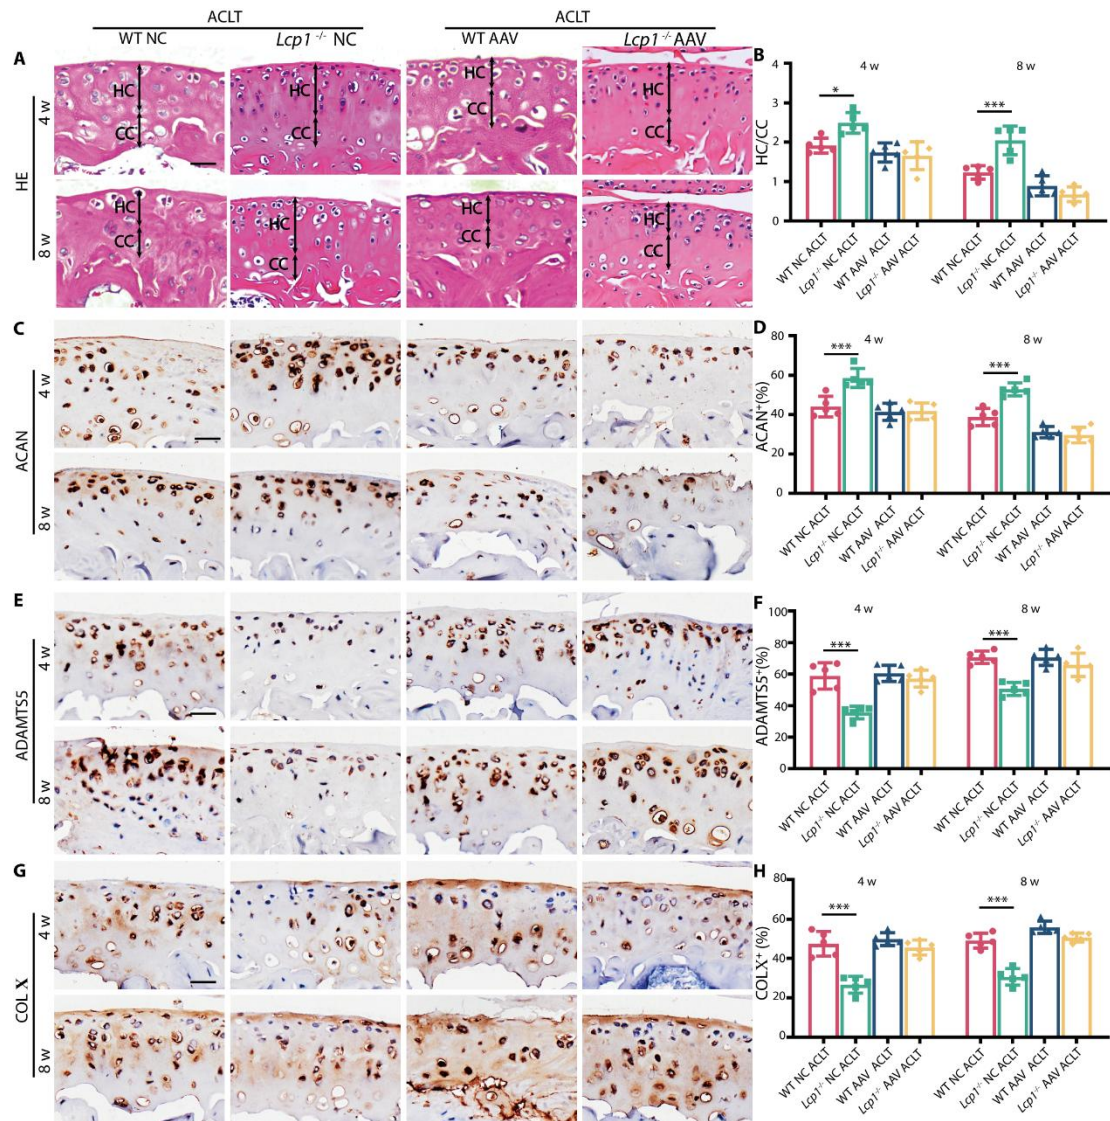

**Fig. S10. Knockdown of *Hif1a* partially abolishes cartilage protection in *Lcp1*<sup>-/-</sup> mice.**

(A) Representative images of hematoxylin and eosin staining of proximal tibia articular cartilage of *Lcp1*<sup>-/-</sup> and WT mice with *Hif1a* AAV or negative control at 4 and 8 weeks after ACLT. Double-headed arrows label range of HC and CC. Scale bar, 50  $\mu$ m. (B) Ratio of HC and CC thickness. (C) Representative images of ACAN immunohistochemistry in tibial articular cartilage of *Lcp1*<sup>-/-</sup> and WT mice with *Hif1a* AAV or negative control at 4 and 8 weeks after ACLT. Scale bar, 20  $\mu$ m. (D) Quantitative analysis of ACAN positive area in articular cartilage. (E) Representative

images of ADAMTS5 immunohistochemistry in tibial articular cartilage of *Lcp1<sup>-/-</sup>* and WT mice with *Hif1a* AAV or negative control at 4 and 8 weeks after ACLT. Scale bar, 20  $\mu$ m. **(F)** Quantitative analysis of ADAMTS5 positive area in articular cartilage. **(G)** Representative images of COL X immunohistochemistry in tibial articular cartilage of *Lcp1<sup>-/-</sup>* and WT mice with *Hif1a* AAV or negative control at 4 and 8 weeks after ACLT. Scale bar, 20  $\mu$ m. **(H)** Quantitative analysis of COL X positive area in articular cartilage. N=5 per group. \*P < 0.05 \*\*P < 0.01, and \*\*\*P < 0.001.

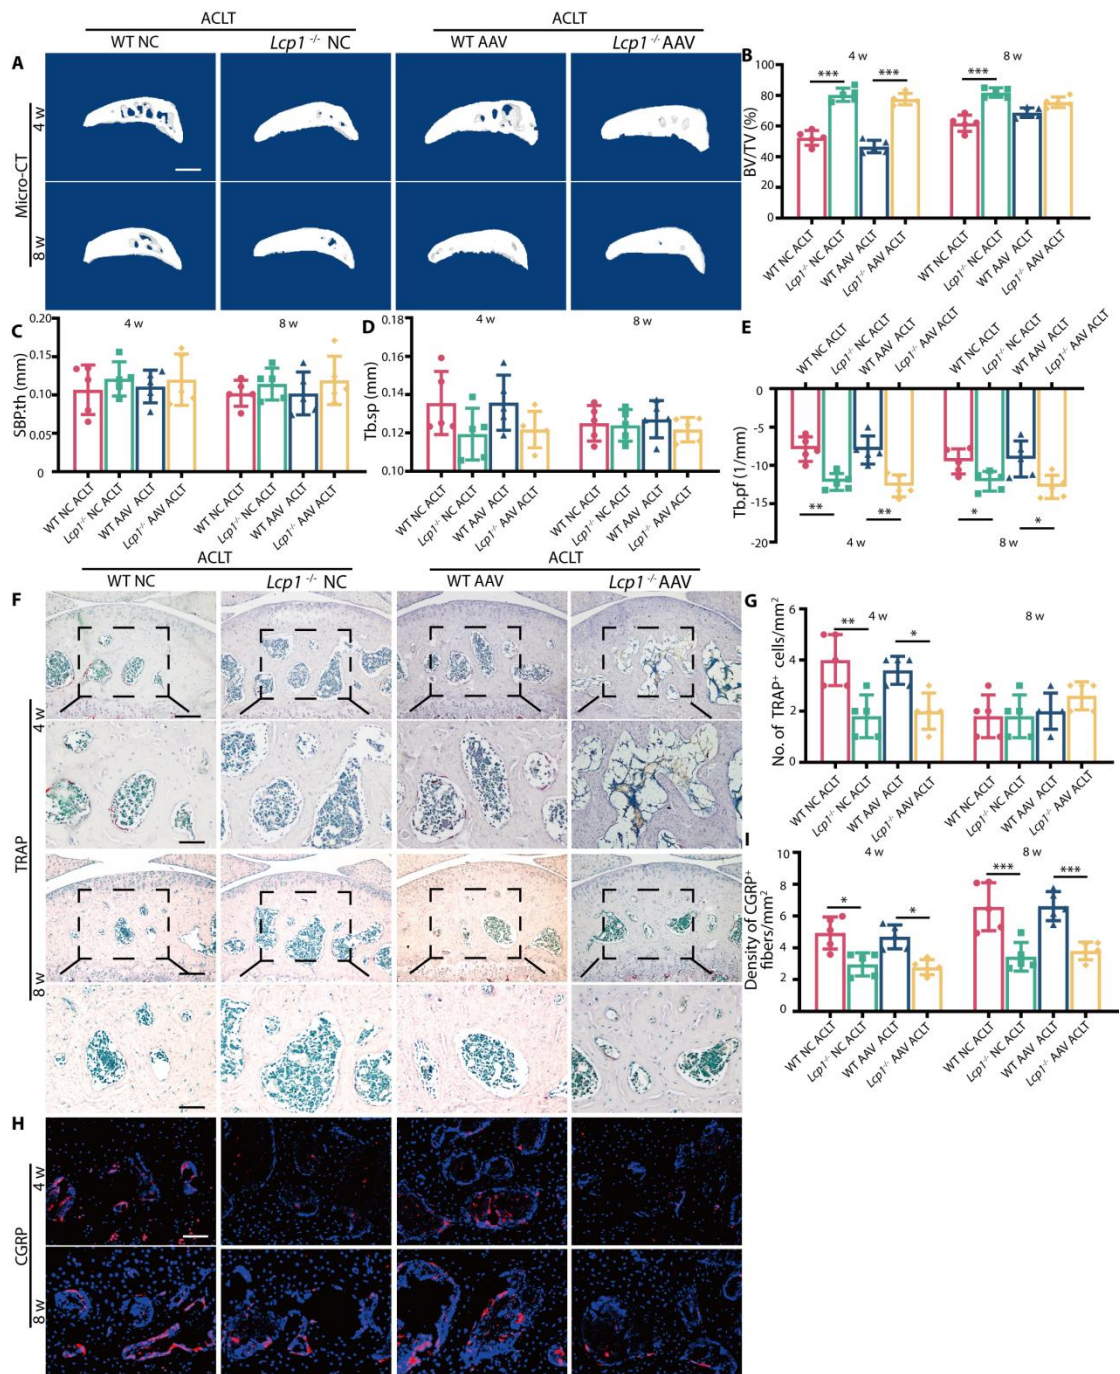

**Fig. S11. Silencing *Hif1a* in cartilage does not affect subchondral bone in *Lcp1*<sup>-/-</sup> mice after ACLT.**

(A) Representative Micro-CT 3D images of tibia subchondral bone of *Lcp1*<sup>-/-</sup> and WT mice with *Hif1a* AAV or negative control at 4 and 8 weeks after ACLT. Scale bar, 500  $\mu\text{m}$ . (B-E) Micro-CT quantitative analysis of tibial subchondral bone, bone volume/tissue volume (BV/TV, %) (B), subchondral bone plate thickness (SBP. Th,

mm) (C), subchondral bone trabecular separation (Tb.sp, mm) (D) and subchondral bone trabecular bone pattern factor (Tb.pf) (E). (F) TRAP staining image of tibial subchondral bone of *Lcp1<sup>-/-</sup>* and WT mice with *Hif1a* AAV or negative control at 4 and 8 weeks after ACLT. Scale bar, 100 $\mu$ m (1,3 row), 50  $\mu$ m (2,4 row). (G) Quantitative analysis of TRAP-positive cells in subchondral bone marrow. (H) Immunofluorescence staining of CGRP<sup>+</sup> sensory nerve fibers of *Lcp1<sup>-/-</sup>* and WT mice with *Hif1a* AAV or negative control at 4 and 8 weeks after ACLT. Scale bar, 50  $\mu$ m. (I) Quantitative analysis of the density CGRP<sup>+</sup> nerve fibers in subchondral bone marrow. N=5 per group. \*P < 0.05 \*\*P < 0.01, and \*\*\*P < 0.001.



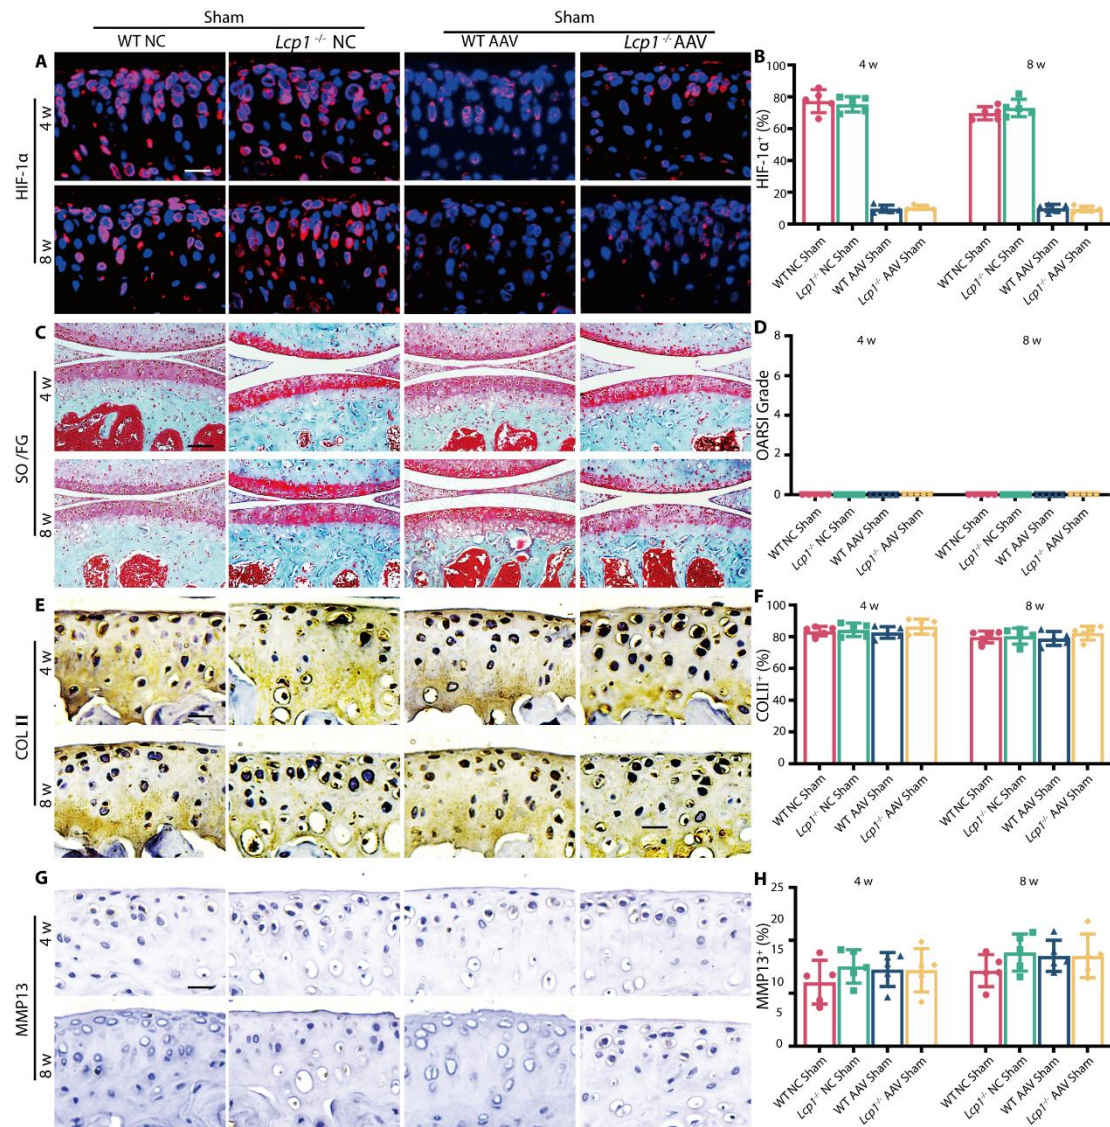

**Fig. S12. Knockdown of *Hif1a* in sham mice has no effect on cartilage degeneration.**

(A) Immunofluorescence staining of HIF-1 $\alpha$  in tibial articular cartilage of *Lcp1<sup>-/-</sup>* and WT mice with *Hif1a* AAV or negative control AAV at 4 and 8 weeks after sham operation. Scale bar, 20  $\mu$ m. (B) Quantitative analysis of HIF-1 $\alpha$  immunofluorescence intensity of mice articular cartilage. (C) Knee articular cartilage safranin O/Fast Green staining of *Lcp1<sup>-/-</sup>* and WT mice with *Hif1a* AAV or negative control AAV at 4 and 8 weeks after sham operation. Scale bar, 100  $\mu$ m. (D) OARSI grade of knee articular cartilage. (E) Representative images of COL II immunohistochemistry in articular

cartilage of *Lcp1<sup>-/-</sup>* and WT mice with *Hif1a* AAV or negative control at 4 and 8 weeks after sham operation. Scale bar, 20  $\mu$ m. **(F)** Quantitative analysis of COL II positive area in articular cartilage. **(G)** Representative images of MMP13 immunohistochemistry in tibial articular cartilage of *Lcp1<sup>-/-</sup>* and WT mice with *Hif1a* AAV or negative control at 4 and 8 weeks after sham operation. Scale bar, 20  $\mu$ m. **(H)** Quantitative analysis of MMP13 positive area in articular cartilage. N=5 per group. \*P < 0.05, \*\*P < 0.01, and \*\*\*P < 0.001.

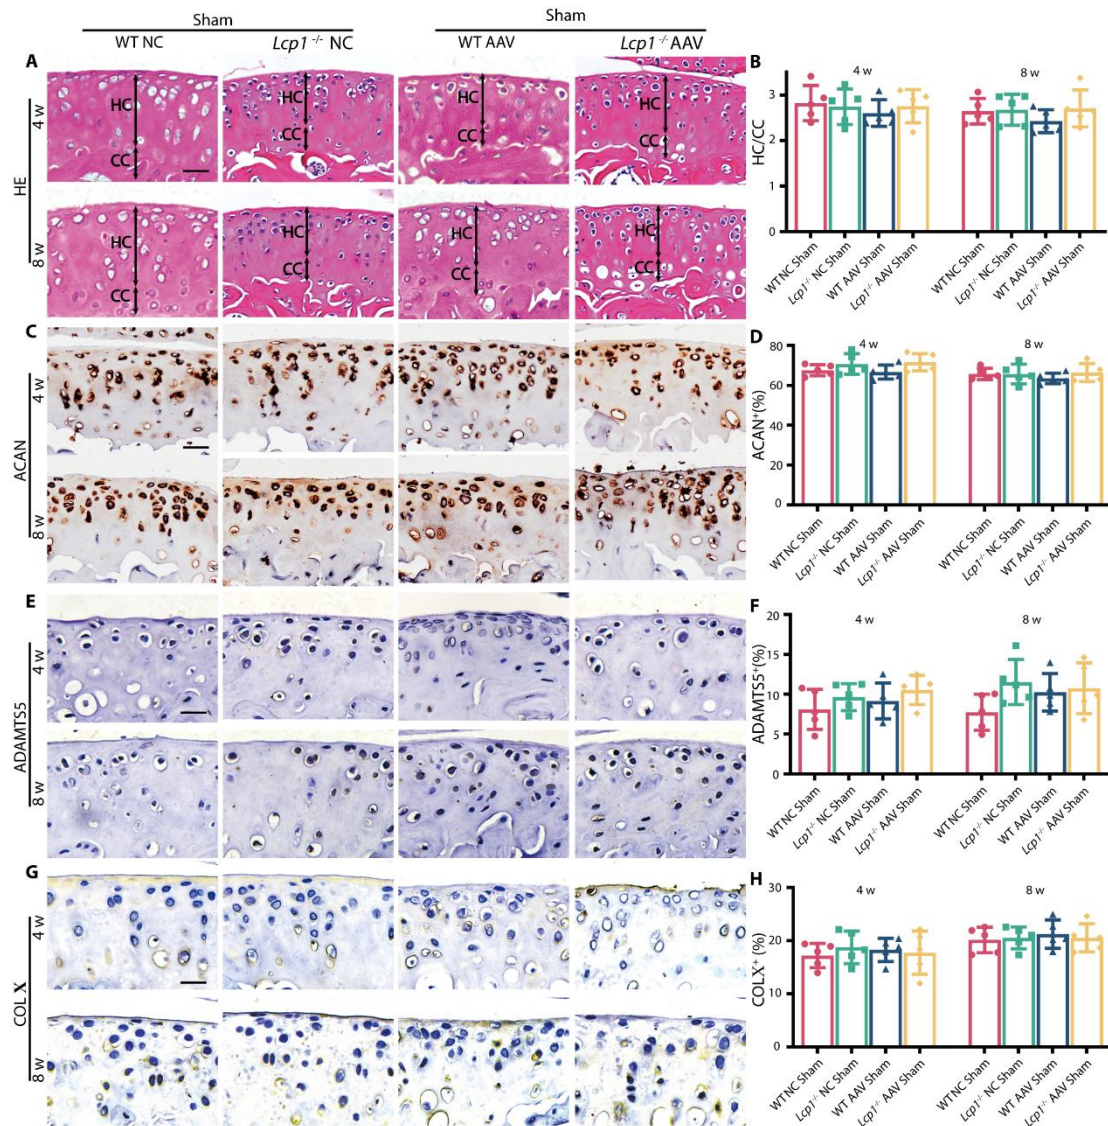

**Fig. S13. Knockdown of *Hif1a* in sham mice has no effect on cartilage calcification.**

(A) Representative images of Hematoxylin and eosin staining of proximal tibia articular cartilage of *Lcp1*<sup>-/-</sup> and WT mice with *Hif1a* AAV or negative control at 4 and 8 weeks after sham operation. Double-headed arrows label range of HC and CC. Scale bar, 50  $\mu$ m. (B) Ratio of HC and CC thickness. (C) Representative images of ACAN immunohistochemistry in tibial articular cartilage of *Lcp1*<sup>-/-</sup> and WT mice with *Hif1a* AAV or negative control at 4 and 8 weeks after sham operation. Scale bar, 20

$\mu\text{m}$ . **(D)** Quantitative analysis of ACAN positive area in articular cartilage. **(E)** Representative immunohistochemical staining of ADAMTS5 immunohistochemistry in tibial articular cartilage of *Lcp1<sup>-/-</sup>* and WT mice with *Hif1a* AAV or negative control at 4 and 8 weeks after sham operation. Scale bar, 20  $\mu\text{m}$ . **(F)** Quantitative analysis of ADAMTS5 positive area in articular cartilage. **(G)** Representative images of COL X immunohistochemistry in tibial articular cartilage of *Lcp1<sup>-/-</sup>* and WT mice with *Hif1a* AAV or negative control at 4 and 8 weeks after sham operation. Scale bar, 20  $\mu\text{m}$ . **(H)** Quantitative analysis of COL X positive area in articular cartilage. N=5 per group. \*P < 0.05, \*\*P < 0.01, and \*\*\*P < 0.001.



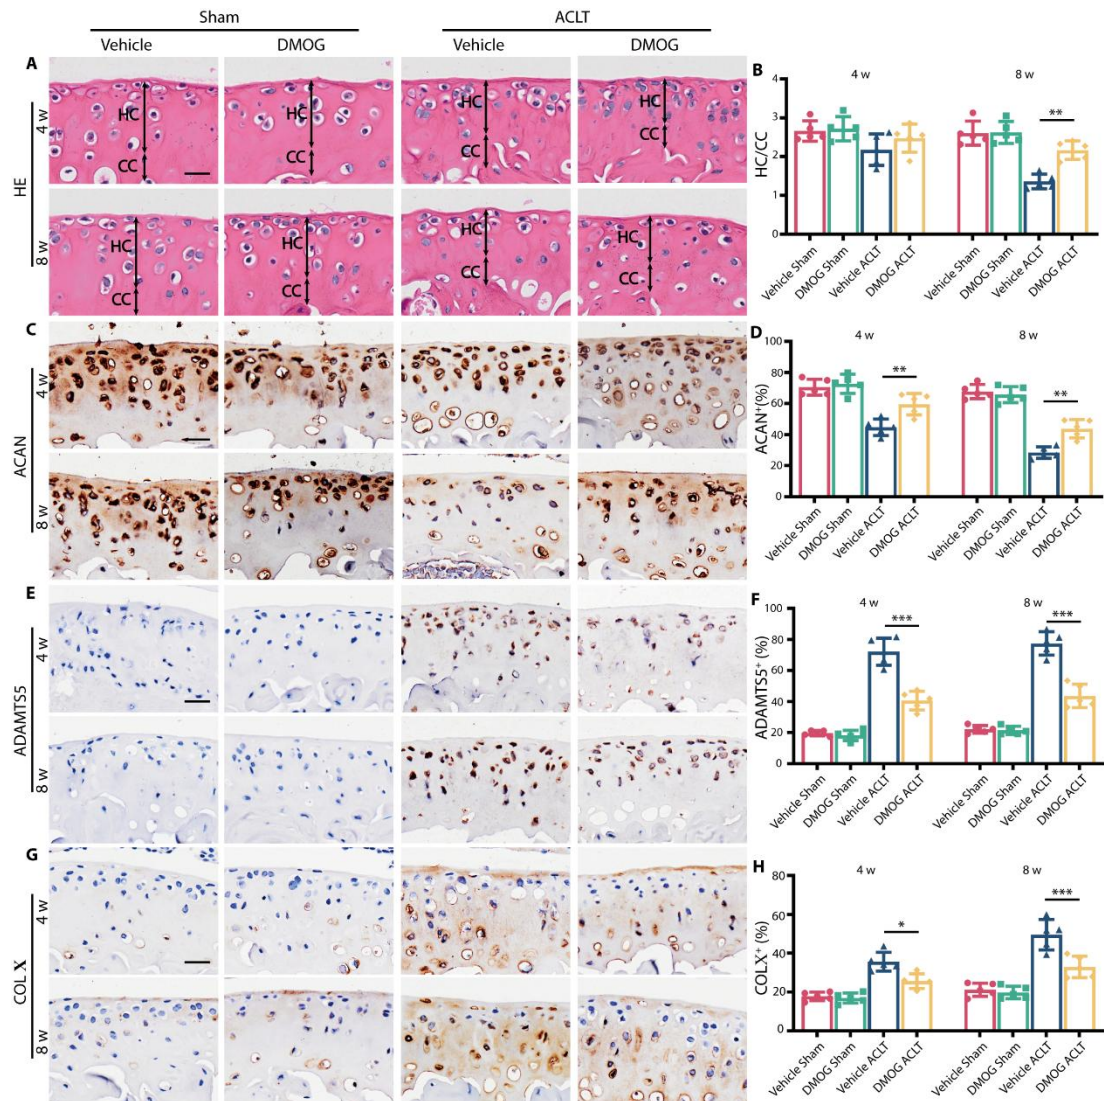

**Fig. S14. DMOG prevents cartilage degeneration.**

(A) Representative images of Hematoxylin and eosin staining of proximal tibia articular cartilage of WT mice with DMOG or normal saline at 4 and 8 weeks after ACLT. Double-headed arrows label range of HC and CC. Scale bar, 50  $\mu$ m. (B) Ratio of HC and CC thickness. (C) Representative images of ACAN immunohistochemistry in tibial articular cartilage of WT mice with DMOG or normal saline at 4 and 8 weeks after ACLT. Scale bar, 20  $\mu$ m. (D) Quantitative analysis of ACAN positive area in articular cartilage. (E) Representative images of ADAMTS5 immunohistochemistry in tibial articular cartilage of WT mice with DMOG or normal saline at 4 and 8 weeks

after ACLT. Scale bar, 20  $\mu\text{m}$ . **(F)** Quantitative analysis of ADAMTS5 positive area in articular cartilage. **(G)** Representative images of COL X immunohistochemistry in tibial articular cartilage of WT mice with DMOG or normal saline at 4 and 8 weeks after ACLT. Scale bar, 20  $\mu\text{m}$ . **(H)** Quantitative analysis of COL X positive area in articular cartilage. N=5 per group. \*P < 0.05, \*\*P < 0.01, and \*\*\*P < 0.001.

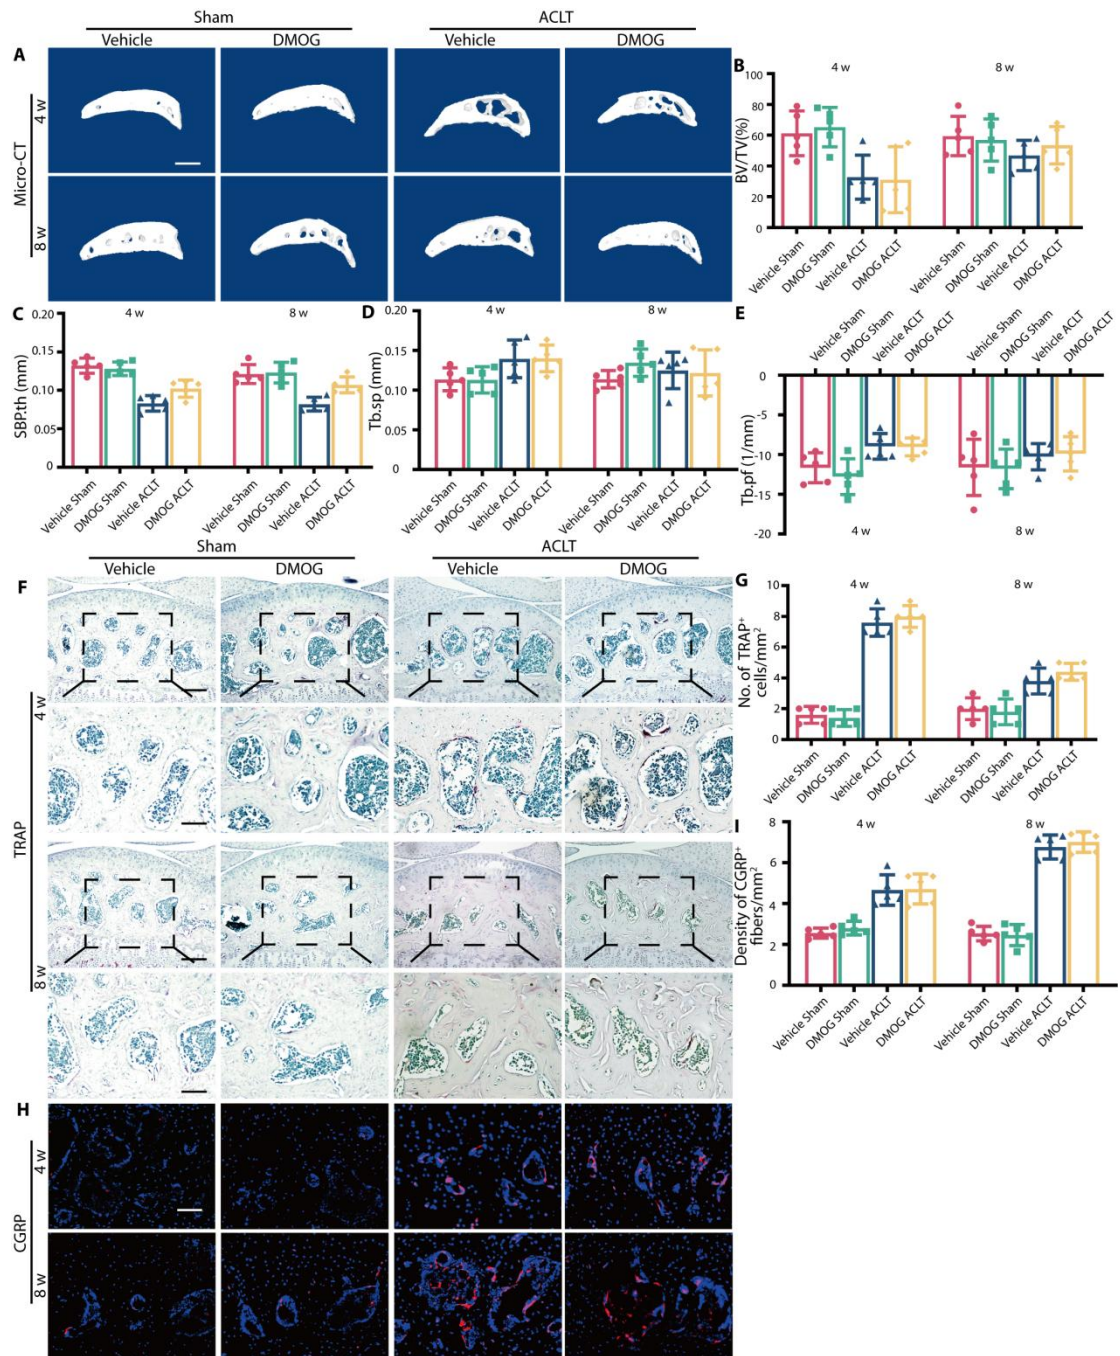

**Fig. S15. DMOG does not affect subchondral bone in OA.**

(A) Representative Micro-CT 3D images of tibia subchondral bone of WT mice with DMOG or normal saline at 4 and 8 weeks after ACLT. Scale bar, 500  $\mu$ m. (B-E) Micro-CT quantitative analysis of tibial subchondral bone, bone volume/tissue volume (BV/TV, %) (B), subchondral bone plate thickness (SBP.Th, mm) (C), subchondral bone trabecular separation (Tb.sp, mm) (D) and subchondral bone

trabecular bone pattern factor (Tb.pf) (E). **(F)** TRAP staining image of tibial subchondral bone of WT mice with DMOG or normal saline at 4 and 8 weeks after ACLT. Scale bar, 100  $\mu\text{m}$  (1,3 row), 50  $\mu\text{m}$  (2,4 row). **(G)** Quantitative analysis of TRAP-positive cells in subchondral bone marrow. **(H)** Immunofluorescence staining of CGRP<sup>+</sup> sensory nerve fibers of WT mice with DMOG or normal saline at 4 and 8 weeks after ACLT. Scale bar, 50  $\mu\text{m}$ . **(I)** Quantitative analysis of the density CGRP<sup>+</sup> nerve fibers in subchondral bone marrow. N=5 per group. \*P < 0.05, \*\*P < 0.01, and \*\*\*P < 0.001.



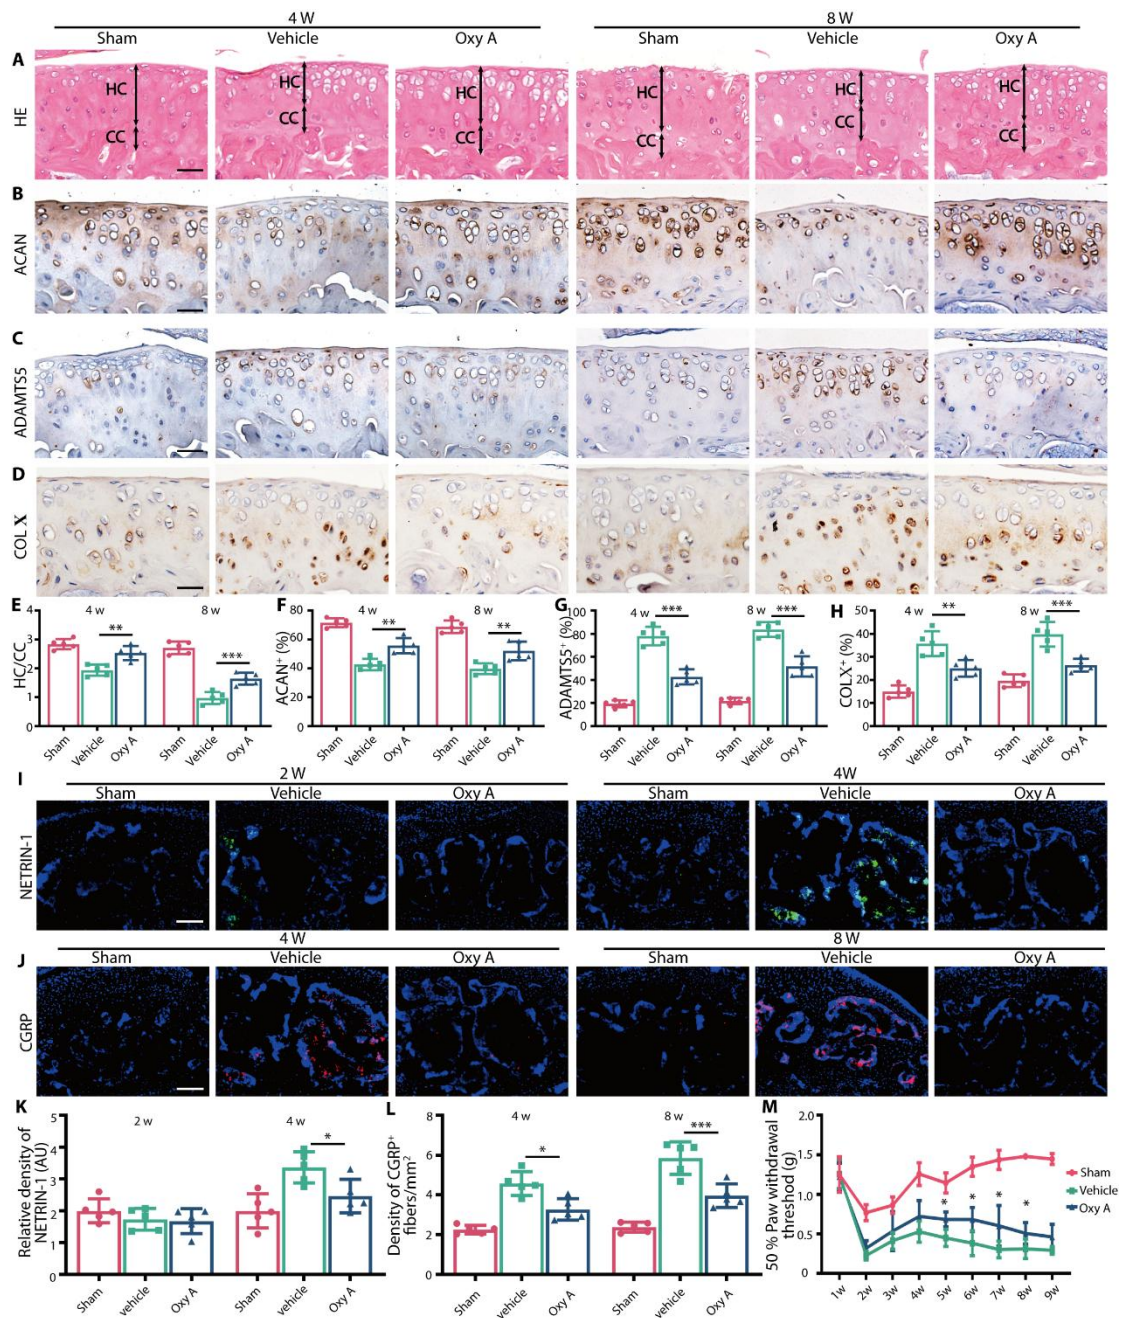

**Fig. S16. Calcified cartilage duplication and sensory nerves innervation are retarded after Oroxylin A injection.**

(A) Representative images of Hematoxylin and eosin staining of proximal tibia articular cartilage of WT mice with Oxy A or normal saline at 4 and 8 weeks after ACLT. Double-headed arrows label range of HC and CC. Scale bar, 50  $\mu$ m. (B) Representative images of ACAN immunohistochemistry in tibial articular cartilage of

WT mice with Oxy A or normal saline at 4 and 8 weeks after ACLT. Scale bar, 20  $\mu\text{m}$ .

**(C)** Representative images of ADAMTS5 immunohistochemistry in tibial articular cartilage of WT mice with Oxy A or normal saline at 4 and 8 weeks after ACLT. Scale bar, 20  $\mu\text{m}$ . **(D)** Representative images of COL X immunohistochemistry in tibial articular cartilage of WT mice with Oxy A or normal saline at 4 and 8 weeks after ACLT. Scale bar, 20  $\mu\text{m}$ . **(E)** Ratio of HC and CC thickness. **(F)** Quantitative analysis of ACAN positive area in articular cartilage. **(G)** Quantitative analysis of ADAMTS5 positive area in articular cartilage. **(H)** Quantitative analysis of COL X positive area in articular cartilage. N=5 per group. **(I)** Immunofluorescence staining of NETRIN-1 in WT mice with Oxy A or normal saline at 2 and 4 weeks after ACLT. Scale bar, 100  $\mu\text{m}$ . **(J)** Immunofluorescence staining of CGRP<sup>+</sup> sensory nerve fibers in WT mice with Oxy A or normal saline at 4 and 8 weeks after ACLT surgery. Scale bar, 100  $\mu\text{m}$ . **(K)** Quantitative analysis of density of NETRIN-1 in subchondral bone marrow. **(L)** Quantitative analysis of the density CGRP<sup>+</sup> nerve fibers in subchondral bone marrow. **(M)** Paw withdrawal threshold was tested at the right hind paw of WT mice with Oxy A or normal saline each week after surgery until 8 weeks. N=5 per group.

\*P < 0.05, \*\*P < 0.01, and \*\*\*P < 0.001.

**Movies S1 Video of  $^{18}\text{F}$ -FMISO PETCT in *Lcp1*<sup>-/-</sup> mice 4 weeks after ACLT**

**Movies S2 Video of  $^{18}\text{F}$ -FMISO PETCT in WT mice 4 weeks after ACLT**
